# Supplementary material for: Active Clinical Trials in Hepatic Encephalopathy: Something Old, Something New and Something Borrowed
Source: Springer Nature journal article supplement (doi:10.1007/s11064-023-03916-w), 2023-03-28
Supplement: MOESM1 [file 11064_2023_3916_MOESM1_ESM.pdf]

ClinicalTrials.gov Search Results 08/19/2022

|   | NCT Number  | Title                                                                                                                                     | Status                 | Study Results        | Conditions                                   | Interventions                                                                         | Characteristics                | Population         | Locations                                                                                                                                                                                                                                                                                                                                                                                                                                                                                                                                                                                                                                                                                                                                                                                                                                                                          |
|---|-------------|-------------------------------------------------------------------------------------------------------------------------------------------|------------------------|----------------------|----------------------------------------------|---------------------------------------------------------------------------------------|--------------------------------|--------------------|------------------------------------------------------------------------------------------------------------------------------------------------------------------------------------------------------------------------------------------------------------------------------------------------------------------------------------------------------------------------------------------------------------------------------------------------------------------------------------------------------------------------------------------------------------------------------------------------------------------------------------------------------------------------------------------------------------------------------------------------------------------------------------------------------------------------------------------------------------------------------------|
| 1 | NCT05070351 | <a href="#">Deprescribing Proton Pump Inhibitors to Reduce Post-TIPS Hepatic Encephalopathy</a>                                           | Recruiting             | No Results Available | •Hepatic Encephalopathy                      | •Drug: PPI deprescribing                                                              | Phase:<br>•Phase 1<br>•Phase 2 | Enrollment:<br>40  | •Duke University Hospital, Durham, North Carolina, United States                                                                                                                                                                                                                                                                                                                                                                                                                                                                                                                                                                                                                                                                                                                                                                                                                   |
| 2 | NCT05279586 | <a href="#">Secondary Prophylaxis of Hepatic Encephalopathy in Cirrhotic Patients</a>                                                     | Not yet recruiting     | No Results Available | •Hepatic Encephalopathy                      | •Drug: lactulose<br>•Drug: colistin                                                   | Phase:<br>Early Phase 1        | Enrollment:<br>316 |                                                                                                                                                                                                                                                                                                                                                                                                                                                                                                                                                                                                                                                                                                                                                                                                                                                                                    |
| 3 | NCT04436601 | <a href="#">Polyethylene Glycol Versus Lactulose on Hepatic Encephalopathy in Patients With Cirrhosis;(PEGHE Trial)</a>                   | Recruiting             | No Results Available | •Hepatic Encephalopathy                      | •Drug: Polyethylene Glycols<br>•Drug: Lactulose                                       | Phase:<br>Phase 4              | Enrollment:<br>102 | •Aga Khan University, Karachi, Sindh, Pakistan                                                                                                                                                                                                                                                                                                                                                                                                                                                                                                                                                                                                                                                                                                                                                                                                                                     |
| 4 | NCT03420482 | <a href="#">Fecal Microbiota Transplant as Treatment of Hepatic Encephalopathy</a>                                                        | Active, not recruiting | No Results Available | •Hepatic Encephalopathy                      | •Drug: Fecal Microbiota Transplant (FMT) oral capsules<br>•Drug: Placebo oral capsule | Phase:<br>Phase 2              | Enrollment:<br>30  | •Massachusetts General Hospital, Boston, Massachusetts, United States                                                                                                                                                                                                                                                                                                                                                                                                                                                                                                                                                                                                                                                                                                                                                                                                              |
| 5 | NCT01846663 | <a href="#">Efficacy, Safety, And Pharmacokinetics Of Rifaximin In Subjects With Severe Hepatic Impairment And Hepatic Encephalopathy</a> | Recruiting             | No Results Available | •Hepatic Encephalopathy                      | •Drug: Placebo<br>•Drug: Rifaximin                                                    | Phase:<br>Phase 4              | Enrollment:<br>100 | •The University of Alabama at Birmingham, Birmingham, Alabama, United States<br><br>•Banner Research, Phoenix, Arizona, United States<br><br>•University Of Arizona Liver Research Institute, Tucson, Arizona, United States<br><br>•Southern California Liver Centers, Coronado, California, United States<br><br>•UCSD Clinical & Translational Research Institute, La Jolla, California, United States<br><br>•Loma Linda University Medical Center Transplantation Institute, Loma Linda, California, United States<br><br>•University of Southern Califorina Keck School Of Medicine, Los Angeles, California, United States<br><br>•Cedars-Sinai Medical Center, Los Angeles, California, United States<br><br>•Inland Empire Liver Foundation, Rialto, California, United States<br><br>•University of Colorado Denver, Aurora, Colorado, United States<br><br>•and 18 more |
| 6 | NCT04161053 | <a href="#">Efficacy and Safety of Nitazoxanide in Preventing Recurrence of Hepatic Encephalopathy</a>                                    | Recruiting             | No Results Available | •Hepatic Encephalopathy                      | •Drug: Rifaximin<br>•Drug: Nitazoxanide                                               | Phase:<br>Phase 3              | Enrollment:<br>60  | •Sherief Abd-Elsalam, Tanta, Egypt                                                                                                                                                                                                                                                                                                                                                                                                                                                                                                                                                                                                                                                                                                                                                                                                                                                 |
| 7 | NCT04899115 | <a href="#">VE303 for Treatment of Hepatic Encephalopathy (HE)</a>                                                                        | Recruiting             | No Results Available | •Cirrhosis<br>•Hepatic Encephalopathy        | •Drug: Placebo<br>•Drug: VE303<br>•Drug: oral vancomycin                              | Phase:<br>Phase 2              | Enrollment:<br>18  | •University of Michigan, Ann Arbor, Michigan, United States                                                                                                                                                                                                                                                                                                                                                                                                                                                                                                                                                                                                                                                                                                                                                                                                                        |
| 8 | NCT04082780 | <a href="#">Rifamycin in Minimal Hepatic Encephalopathy</a>                                                                               | Recruiting             | No Results Available | •Hepatic Encephalopathy<br>•Cirrhosis, Liver | •Drug: Rifamycin SV MMX<br>•Other: Placebo                                            | Phase:<br>Phase 2              | Enrollment:<br>40  | •Hunter Holmes McGuire VA Medical Center, Richmond, Virginia, United States                                                                                                                                                                                                                                                                                                                                                                                                                                                                                                                                                                                                                                                                                                                                                                                                        |

|    | NCT Number  | Title                                                                                                                                | Status             | Study Results        | Conditions                                                                                                                                                                                           | Interventions                                                                                                                                                                                           | Characteristics                                                                  | Population      | Locations                                                                                                                                                                                                                                                                                                                                                                                                   |
|----|-------------|--------------------------------------------------------------------------------------------------------------------------------------|--------------------|----------------------|------------------------------------------------------------------------------------------------------------------------------------------------------------------------------------------------------|---------------------------------------------------------------------------------------------------------------------------------------------------------------------------------------------------------|----------------------------------------------------------------------------------|-----------------|-------------------------------------------------------------------------------------------------------------------------------------------------------------------------------------------------------------------------------------------------------------------------------------------------------------------------------------------------------------------------------------------------------------|
| 9  | NCT03796598 | <a href="#">FMT in Cirrhosis and Hepatic Encephalopathy</a>                                                                          | Recruiting         | No Results Available | <ul style="list-style-type: none"><li>•Cirrhosis</li><li>•Hepatic Encephalopathy</li></ul>                                                                                                           | <ul style="list-style-type: none"><li>•Drug: Fecal Microbial transplant Capsules</li><li>•Drug: Fecal Microbial Transplant Enema</li><li>•Other: Placebo</li></ul>                                      | Phase: <ul style="list-style-type: none"><li>•Phase 1</li><li>•Phase 2</li></ul> | Enrollment: 60  | <ul style="list-style-type: none"><li>•Hunter Holmes McGuire VA Medical Center, Richmond, VA, Richmond, Virginia, United States</li></ul>                                                                                                                                                                                                                                                                   |
| 10 | NCT04155099 | <a href="#">Investigational Microbiota Restoration Therapeutic for Hepatic Encephalopathy</a>                                        | Recruiting         | No Results Available | <ul style="list-style-type: none"><li>•Hepatic Encephalopathy</li><li>•Cirrhosis, Liver</li></ul>                                                                                                    | <ul style="list-style-type: none"><li>•Biological: RBX7455</li><li>•Biological: Placebo</li></ul>                                                                                                       | Phase:<br>Phase 2                                                                | Enrollment: 75  | <ul style="list-style-type: none"><li>•Ochsner Medical Center, Jefferson, Louisiana, United States</li></ul>                                                                                                                                                                                                                                                                                                |
| 11 | NCT05297448 | <a href="#">Study to Assess Rifaximin Soluble Solid Dispersion (SSD) for the Delay of Encephalopathy Decompensation in Cirrhosis</a> | Recruiting         | No Results Available | <ul style="list-style-type: none"><li>•Hepatic Encephalopathy</li></ul>                                                                                                                              | <ul style="list-style-type: none"><li>•Drug: Rifaximin SSD</li><li>•Drug: Placebo</li></ul>                                                                                                             | Phase:<br>Phase 3                                                                | Enrollment: 466 | <ul style="list-style-type: none"><li>•Bausch Site 501, New Orleans, Louisiana, United States</li></ul>                                                                                                                                                                                                                                                                                                     |
| 12 | NCT05071716 | <a href="#">Study to Assess Rifaximin Soluble Solid Dispersion (SSD) for the Delay of Encephalopathy Decompensation in Cirrhosis</a> | Recruiting         | No Results Available | <ul style="list-style-type: none"><li>•Hepatic Encephalopathy</li></ul>                                                                                                                              | <ul style="list-style-type: none"><li>•Drug: Rifaximin SSD</li><li>•Drug: Placebo</li></ul>                                                                                                             | Phase:<br>Phase 3                                                                | Enrollment: 466 | <ul style="list-style-type: none"><li>•Bausch Site 001, Palmetto Bay, Florida, United States</li></ul>                                                                                                                                                                                                                                                                                                      |
| 13 | NCT04244877 | <a href="#">Rifaximin's Effect on Covert Hepatic Encephalopathy With SIBO and Gastrointestinal Dysmotility</a>                       | Recruiting         | No Results Available | <ul style="list-style-type: none"><li>•Cirrhosis, Liver</li><li>•Minimal Hepatic Encephalopathy</li><li>•Small Intestinal Bacterial Overgrowth</li><li>•Gastrointestinal Motility Disorder</li></ul> | <ul style="list-style-type: none"><li>•Drug: Rifaximin</li></ul>                                                                                                                                        | Phase:<br>Phase 3                                                                | Enrollment: 20  | <ul style="list-style-type: none"><li>•Metrohealth Medical Center, Cleveland, Ohio, United States</li></ul>                                                                                                                                                                                                                                                                                                 |
| 14 | NCT04073290 | <a href="#">Prevention of Post-TIPS Hepatic Encephalopathy by Administration of Rifaximin and Lactulose</a>                          | Recruiting         | No Results Available | <ul style="list-style-type: none"><li>•Hepatic Encephalopathy</li><li>•Cirrhosis, Liver</li><li>•Portal Hypertension</li><li>•Liver Diseases</li><li>•Pathological Processes</li></ul>               | <ul style="list-style-type: none"><li>•Drug: Rifaximin 550 milligram Oral Tablet [XIFAXAN]</li><li>•Drug: Placebo oral tablet</li><li>•Drug: Lactulose 667 milligram/milliliter Oral Solution</li></ul> | Phase:<br>Phase 4                                                                | Enrollment: 238 | <ul style="list-style-type: none"><li>•Universitaire Ziekenhuizen Leuven, Leuven, Belgium</li><li>•Academic Medical Centre, Amsterdam, Netherlands</li><li>•University Medical Center Groningen, Groningen, Netherlands</li><li>•Leiden University Medical Center, Leiden, Netherlands</li><li>•Radboud University, Nijmegen, Netherlands</li><li>•Erasmus Medical Center, Rotterdam, Netherlands</li></ul> |
| 15 | NCT05128305 | <a href="#">Integrated Traditional Chinese and Clinical Medicine for Chronic Hepatitis B and Its Complication</a>                    | Not yet recruiting | No Results Available | <ul style="list-style-type: none"><li>•Hepatic Encephalopathy</li><li>•Cirrhosis, Liver</li><li>•Portosystemic Shunt</li></ul>                                                                       | <ul style="list-style-type: none"><li>•Drug: traditional Chinese medicine1 and traditional Chinese medicine 2</li></ul>                                                                                 | Phase:<br>Phase 3                                                                | Enrollment: 276 | <ul style="list-style-type: none"><li>•he First Affiliated Hospital of Shandong First Medical University &amp; Shandong Provincial Qianfoshan Hospital, Jinan, Shandong, China</li></ul>                                                                                                                                                                                                                    |

|    | NCT Number  | Title                                                                       | Status     | Study Results        | Conditions                                                                                                                                                                                        | Interventions                                                                                                                                                                                                                                                                                               | Characteristics                                                                  | Population         | Locations                                                                                                                                                                                                                                                                                                                                                                                                                                                                                                                                                                                                                                                                                                                                                                                                                                                                                                                              |
|----|-------------|-----------------------------------------------------------------------------|------------|----------------------|---------------------------------------------------------------------------------------------------------------------------------------------------------------------------------------------------|-------------------------------------------------------------------------------------------------------------------------------------------------------------------------------------------------------------------------------------------------------------------------------------------------------------|----------------------------------------------------------------------------------|--------------------|----------------------------------------------------------------------------------------------------------------------------------------------------------------------------------------------------------------------------------------------------------------------------------------------------------------------------------------------------------------------------------------------------------------------------------------------------------------------------------------------------------------------------------------------------------------------------------------------------------------------------------------------------------------------------------------------------------------------------------------------------------------------------------------------------------------------------------------------------------------------------------------------------------------------------------------|
| 16 | NCT04862221 | <a href="#">Treatment for Immune Mediated Pathophysiology</a>               | Recruiting | No Results Available | <ul style="list-style-type: none"><li>•Acute Liver Failure</li><li>•Fulminant Hepatic Failure</li><li>•Hepatic Encephalopathy</li><li>•Acute Liver Injury</li><li>•Immune Dysregulation</li></ul> | <ul style="list-style-type: none"><li>•Drug: High-dose methylprednisolone</li><li>•Drug: Equine anti-thymocyte globulin</li><li>•Drug: Prednisolone</li><li>•Drug: Placebo for prednisolone</li><li>•Drug: Placebo for infusions</li><li>•Drug: Diphenhydramine</li><li>•Drug: Methylprednisolone</li></ul> | Phase:<br>Phase 2                                                                | Enrollment:<br>160 | <ul style="list-style-type: none"><li>•Children's Hospital Los Angeles, Los Angeles, California, United States</li><li>•Lucile Packard Children's Hospital, Palo Alto, California, United States</li><li>•University of California San Francisco Benioff Children's Hospital, San Francisco, California, United States</li><li>•Children's Hospital Colorado, Aurora, Colorado, United States</li><li>•Yale New Haven Children's Hospital, New Haven, Connecticut, United States</li><li>•Emory Children's Healthcare of Atlanta, Atlanta, Georgia, United States</li><li>•Ann &amp; Robert H. Lurie Children's Hospital of Chicago, Chicago, Illinois, United States</li><li>•Riley Hospital for Children, Indianapolis, Indiana, United States</li><li>•Children's Hospital Boston, Boston, Massachusetts, United States</li><li>•The Children's Mercy Hospital, Kansas City, Missouri, United States</li><li>•and 10 more</li></ul> |
| 17 | NCT05061992 | <a href="#">A Trial to Improve Quality of Life in People With Cirrhosis</a> | Recruiting | No Results Available | <ul style="list-style-type: none"><li>•Cirrhosis</li></ul>                                                                                                                                        | <ul style="list-style-type: none"><li>•Drug: Lactulose</li></ul>                                                                                                                                                                                                                                            | Phase: <ul style="list-style-type: none"><li>•Phase 2</li><li>•Phase 3</li></ul> | Enrollment:<br>75  | <ul style="list-style-type: none"><li>•University of Michigan, Ann Arbor, Michigan, United States</li></ul>                                                                                                                                                                                                                                                                                                                                                                                                                                                                                                                                                                                                                                                                                                                                                                                                                            |
| 18 | NCT04932577 | <a href="#">Faecal Microbiota Transplantation for Liver Cirrhosis</a>       | Recruiting | No Results Available | <ul style="list-style-type: none"><li>•Liver Cirrhosis</li></ul>                                                                                                                                  | <ul style="list-style-type: none"><li>•Biological: Faecal microbiota transplantation</li><li>•Biological: Placebo</li></ul>                                                                                                                                                                                 | Phase: <ul style="list-style-type: none"><li>•Phase 2</li><li>•Phase 3</li></ul> | Enrollment:<br>220 | <ul style="list-style-type: none"><li>•Department of Hepatology and Gastroenterology, Aarhus University Hospital, Aarhus, Denmark</li></ul>                                                                                                                                                                                                                                                                                                                                                                                                                                                                                                                                                                                                                                                                                                                                                                                            |

Active clinical trials in hepatic encephalopathy: something old, something new and something borrowed. Neurochemical Research.

Tiziano Balzano

HM CINAC (Centro Integral de Neurociencias Abarca Campal), Hospital Universitario HM Puerta del Sur, HM Hospitales; Madrid, Spain  
Correspondence: [tbalzano.hmcinac@hmhospitales.com](mailto:tbalzano.hmcinac@hmhospitales.com)
